# Supplementary material for: Australian trial of behavioural activation for people with schizophrenia experiencing negative symptoms: a feasibility randomised controlled trial protocol
Source: HighWire-hosted journal article supplement (doi:10.1136/bmjopen-2023-080245), 2024-05-01
Supplement: bmjopen-2023-080245supp005_data_supplement.pdf [file bmjopen-2023-080245supp005_data_supplement.pdf]

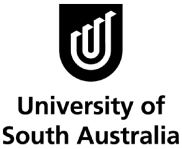

Consent Form- Interviews- Staff/Patients

Supplementary file 5

*This project will be carried out according to the National Statement on Ethical Conduct in Human Research (2007) incorporating all updates. This statement has been developed to protect the interests of people who agree to participate in human research studies. The project has been approved by the Central Adelaide Local Health Network Human Research Ethics Committee. If you wish to speak to someone not directly involved in the study about your rights as a volunteer, or about the conduct of the study, you may also contact CALHN Research Services, Telephone: (08) 7117 2224, Email: [Health.CALHNResearchLNR@sa.gov.au](mailto:Health.CALHNResearchLNR@sa.gov.au)*

| SECTION 1: CONTACT AND PROJECT DETAILS |                                                                                                                                              |
|----------------------------------------|----------------------------------------------------------------------------------------------------------------------------------------------|
| Researcher's Full Name                 | Associate Professor Martin Jones                                                                                                             |
| Contact Details                        | Email: martin.jones@unisa.edu.au.; Mobile Phone contact details: +61 8 8647 6011                                                             |
| Supervisor's Name (students only)      |                                                                                                                                              |
| Contact Details                        |                                                                                                                                              |
| Project Number                         | 2023/HRE00120                                                                                                                                |
| Project Title                          | Co-delivery of teletrial Behavioural Activation in people with negative symptoms of Schizophrenia: a Feasibility Randomised Controlled Trial |
| Short title                            | Tele trial Behavioural Activation for People with negative symptoms                                                                          |
| Project sponsor                        | University of South Australia                                                                                                                |
| Location                               | Rural South Australia                                                                                                                        |

| SECTION 2: PARTICIPANT CERTIFICATION  |                                                                                                                                                                                                                                                                   |
|---------------------------------------|-------------------------------------------------------------------------------------------------------------------------------------------------------------------------------------------------------------------------------------------------------------------|
| In signing this form, I confirm that: |                                                                                                                                                                                                                                                                   |
| 1.                                    | I confirm that I am over 18 years of age.                                                                                                                                                                                                                         |
| 2.                                    | I have read the Participant Information Sheet, or someone has read it to me in a language that I understand.                                                                                                                                                      |
| 3.                                    | I have had an opportunity to ask questions and I am satisfied with the answers I have received.                                                                                                                                                                   |
| 4.                                    | The nature, purpose and risks of the research project have been explained to me. Details of procedures and any risks have been explained to my satisfaction. I understand them and agree to take part.                                                            |
| 5.                                    | I understand that I may be asked to participate in an interview to share my opinion about the support that I received from the mental health worker, what I most liked, what I did not like and suggestions for improvement.                                      |
| 6.                                    | I freely agree to participate in this research project as described and understand that I am free to withdraw at any time during the project without affecting my status with my local health network or the University of South Australia, now or in the future. |
| 7.                                    | I understand that I may not directly benefit from taking part in the project.                                                                                                                                                                                     |
| 8.                                    | I understand that I will be given a signed copy of this document to keep.                                                                                                                                                                                         |
| 9.                                    | I understand that should I choose to withdraw from the study, I have to contact the research tele trial nurse.                                                                                                                                                    |
| 10.                                   | I understand that should I choose to withdraw from the study, I have until two weeks after completing the consent form to request that my data be removed from the project.                                                                                       |
| 11.                                   | I understand that the de-identified information that is accessed as part of the project will be stored separately from any identifying information on secure and access-restricted computer                                                                       |

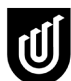

University of  
South Australia

## Consent Form- Interviews- Staff/Patients

|                                                                                                   |                                                                                                                                                                                                                                                                                                                                                                                                                                                   |      |
|---------------------------------------------------------------------------------------------------|---------------------------------------------------------------------------------------------------------------------------------------------------------------------------------------------------------------------------------------------------------------------------------------------------------------------------------------------------------------------------------------------------------------------------------------------------|------|
| servers of the University of South Australia for 15 years; after which time it will be destroyed. |                                                                                                                                                                                                                                                                                                                                                                                                                                                   |      |
| 12.                                                                                               | I understand that while the information gained during the project may be published, I will not be identified and my results will remain confidential in accordance with relevant Australian and/or South Australian privacy and other relevant laws, unless required by law.                                                                                                                                                                      |      |
| 13.                                                                                               | I understand that participation in the research may be potentially emotionally and psychologically distressing and cause discomfort. However, it is not anticipated that there are risks to participation in this study beyond those encountered in everyday life. I understand that I will have opportunities to debrief with peers, my family members, mental health worker, other local health worker or my general practitioner, if required. |      |
| 14.                                                                                               | Although I understand that the purpose of this research project is to improve access to support for people with negative symptoms of schizophrenia, it has also been explained that my involvement may not be of any benefit to me.                                                                                                                                                                                                               |      |
| 15.                                                                                               | If I want to know the findings of the research study, I can do so by contacting any of the researchers.                                                                                                                                                                                                                                                                                                                                           |      |
|                                                                                                   |                                                                                                                                                                                                                                                                                                                                                                                                                                                   |      |
| Name of Participant                                                                               | (Please print)                                                                                                                                                                                                                                                                                                                                                                                                                                    | Date |
| Participant's Signature                                                                           |                                                                                                                                                                                                                                                                                                                                                                                                                                                   |      |
| Name of Witness to participant                                                                    | (Please print)                                                                                                                                                                                                                                                                                                                                                                                                                                    |      |
| Witness signature                                                                                 |                                                                                                                                                                                                                                                                                                                                                                                                                                                   | Date |

### SECTION 3: RESEARCHER CERTIFICATION

I have given a verbal explanation of the research project, its procedures and risks, and the implications of withdrawal from the research project and I believe that the participant has understood that explanation.

|                                     |                        |      |
|-------------------------------------|------------------------|------|
| Researcher's name<br>(please print) | Researcher's signature | Date |
|                                     |                        |      |



University of  
South Australia

## Consent Form- Interviews- Staff/Patients
